# Effect of Proton Pump Inhibitors on *In Vitro* Activity of Tigecycline against Several Common Clinical Pathogens

Wentao Ni<sup>1</sup>, Xuejiu Cai<sup>1</sup>, Beibei Liang<sup>2</sup>, Yun Cai<sup>2</sup>, Junchang Cui<sup>1\*</sup>, Rui Wang<sup>2</sup>

**1** Department of Respiratory Diseases, Chinese People's Liberation Army General Hospital, Beijing, China, **2** Department of Clinical Pharmacology, Chinese People's Liberation Army General Hospital, Beijing, China

## Abstract

In this study, we evaluated the effect of proton pump inhibitors (PPIs) on *in vitro* antimicrobial activity of tigecycline against several species of clinical pathogens. Clinical non-duplicate isolates of *Acinetobacter baumannii*, *Staphylococcus aureus*, *Enterococcus faecalis* and three species of *Enterobacteriaceae* (*Escherichia coli*, *Klebsiella pneumonia* and *Enterobacter cloacae*) were collected from a tertiary hospital and their MICs of tigecycline alone and in combination with PPIs (omeprazole, lansoprazole and pantoprazole) were determined. With one randomly selected isolate of each bacterial species, an *in vitro* time-kill study was performed for the confirmation of the effect of PPIs on tigecycline activity. The MIC changes after PPIs addition correlated with the PPIs concentrations in the test media. Compared with tigecycline alone, the addition of 5 mg/L PPIs could increase the MICs of tigecycline by 0 to 2-fold and the addition of 50 mg/L PPIs could increase the MICs of tigecycline by 4 to >128-fold. The time-kill study confirmed that the addition of PPIs could affect the *in vitro* activity of tigecycline. Even at low concentration (5 mg/L) of omeprazole and pantoprazole, antagonistic effect could be observed in *E. cloacae* and *E. faecalis* strains. We conclude that *In vitro* activity of tigecycline can be influenced by the presence of PPIs in a concentration-dependent manner.

**Citation:** Ni W, Cai X, Liang B, Cai Y, Cui J, et al. (2014) Effect of Proton Pump Inhibitors on *In Vitro* Activity of Tigecycline against Several Common Clinical Pathogens. PLoS ONE 9(1): e86715. doi:10.1371/journal.pone.0086715

**Editor:** Mark Alexander Webber, University of Birmingham, United Kingdom

**Received:** September 26, 2013; **Accepted:** December 10, 2013; **Published:** January 21, 2014

**Copyright:** © 2014 Ni et al. This is an open-access article distributed under the terms of the Creative Commons Attribution License, which permits unrestricted use, distribution, and reproduction in any medium, provided the original author and source are credited.

**Funding:** This work was supported by the National Natural Science Foundation of China (no. 81371855) and the Beijing Municipal Natural Science Foundation of China (no. 7112127). The funders had no role in study design, data collection and analysis, decision to publish, or preparation of the manuscript.

**Competing Interests:** The authors have declared that no competing interests exist.

\* E-mail: guoguoyoumeng@163.com

## Introduction

Tigecycline is the first commercially available member of glycyclines which are derived from minocycline. [1] It is a bacteriostatic agent with appealing *in vitro* activity against various multidrug-resistant pathogens such as vancomycin-resistant *Enterococcus faecalis* and *Enterococcus faecium*, methicillin-resistant *Staphylococcus aureus*, *Acinetobacter spp.*, and Gram-negative bacteria producing extended-spectrum beta-lactamases. [2] However, since tigecycline has been widely prescribed to treat these organisms, resistant strains are increasingly reported around the world. [3] It's worth noting that Cordina et al. reported the emergence of tigecycline-resistant *E. faecalis* in a patient might be associated with prolonged use of omeprazole. [4] Werner et al. and Yang and Chua showed that addition of omeprazole to test medium could lead to increased MIC of tigecycline in one *E. faecalis* strain and one *A. baumannii* strain respectively. [5,6] Whether these are accidental phenomena or the concomitant use of omeprazole could influence the activity of tigecycline is worthy of further investigation. And whether other commonly used proton pump inhibitors (PPIs) in clinical practice such as lansoprazole and pantoprazole could also affect the MICs of tigecycline is unknown. Therefore, the present work was done to evaluate the effect of PPIs on *in vitro* antimicrobial activity of tigecycline against several species of clinical pathogens.

## Materials and Methods

### Bacterial Strains

Clinical non-duplicate isolates of *A. baumannii*, *S. aureus*, *E. faecalis* and three species of *Enterobacteriaceae* (*Escherichia coli*, *Klebsiella pneumonia* and *Enterobacter cloacae*) were randomly selected from the specimen database of department of clinical microbiology in our hospital and all strains were collected from hospitalized patients during routine healthy care at different time periods between 2008 and 2011. Data has been de-identified prior to analysis. Most strains were isolated from sputum specimens and all strains were identified using the Vitek II system (bioMe'rieux, Balmes-les-Grottes, France). *E. coli* ATCC 25922 was used as the reference strain.

### Chemicals and Media

Tigecycline was obtained from Wyeth Pharmaceutical (Wyeth Pharmaceutical, Philadelphia, USA). Omeprazole, lansoprazole and pantoprazole standards were purchased from Sigma-Aldrich (Shanghai, China). Mueller Hinton agar (MHA) and Cation-Adjusted Mueller Hinton II Broth (CA-MHB) were purchased from Becton, Dickinson and Co., (Franklin Lakes, NJ, USA). Solutions of all chemicals were freshly prepared on the day of each use, following the manufacturer's instructions.

## Susceptibility Testing

The *in vitro* antimicrobial susceptibilities for tigecycline alone and in combination with PPIs were determined by agar dilution method. The guidelines and interpretation of the CLSI were followed for the susceptibility determination. [7,8] In brief, isolates stored at  $-70^{\circ}\text{C}$  were thawed, subcultured using MHA plates and incubated for 24 h at  $37^{\circ}\text{C}$  in ambient air. Then, isolated colonies were transferred to CA-MHB and cultures were grown to a cell density of approximately  $10^8$  CFU/ml. By using an autoclaved replicator, approximately  $10^4$  CFU bacterial cells were inoculated onto MHA plates containing a series of 2-fold concentration increment of tigecycline alone and in combination with either omeprazole (5, 10 or 50 mg/L), lansoprazole (5, 10 or 50 mg/L) or pantoprazole (5, 10 or 50 mg/L). Inoculated MHA plates were incubated at  $37^{\circ}\text{C}$  for 24 h in ambient air. The MIC was defined as the lowest drug concentration that inhibited the visible growth of colonies. All the susceptibility tests were carried out in triplicate on separate days.

## Time-kill Assays

One isolate of each bacterial species was randomly selected for the time-kill assays. Tubes containing freshly prepared CA-MHB supplemented with tigecycline in the presence or absence of PPIs were inoculated with isolates to a density of  $\sim 5 \times 10^5$  CFU/ml in a final volume of 10 ml and incubated in a shaking bath at  $37^{\circ}\text{C}$ . Samples were obtained from each tube at time 0, 3, 6, 12 and 24 h after inoculation and serially diluted in sterile 0.85% sodium chloride solution for determination of viable counts. The Diluted samples, in 0.05-ml aliquots, were plated in duplicate on MHA plates. After the diluted samples incubated at  $37^{\circ}\text{C}$  for 24 h in ambient air, colonies formed were counted, and the total bacterial  $\log_{10}$  CFU/ml of the original sample was calculated. The concentration of tigecycline used in time-kill assays was 2-fold the MIC value of each isolate that was obtained from the susceptibility testing mentioned in the preceding paragraph. And the concentration of each PPI added in the time-kill assays tubes was 5 mg/L and 50 mg/L. The antagonistic effect of PPIs on tigecycline was interpreted as a  $\geq 2 \log_{10}$  increase in CFU/ml between the combination and tigecycline used alone [9].

## Results and Discussion

Table 1 shows the median value of MICs ( $\text{MIC}_{50}$ ) of tigecycline for strains of each species, as a function of adding three kinds of

PPIs at different concentrations. There is no change of MICs in all strains with an addition of 5 mg/L lansoprazole and the MICs of 93% strains did not increase with an addition of 5 mg/L omeprazole (data were not shown). However,  $\text{MIC}_{50}$  values doubled for *E. coli*, *K. pneumoniae* and *E. faecalis* at pantoprazole concentration of 5 mg/L. Omeprazole and pantoprazole at 10 mg/L increased by 2-fold, or 4-fold, the MICs of all species, while the effect of lansoprazole at 10 mg/L was limited to *A. baumannii*. When the concentrations of PPIs added reached to 50 mg/L, MIC values increased substantially. A 4–8 fold increase was seen in lansoprazole, and 32–128 fold or more, increase could be found in omeprazole and pantoprazole.

To confirm the effect of PPIs on tigecycline activity, we performed the time-kill assays of tigecycline for one randomly selected isolate of each species, in the presence or absence of PPIs at two different concentrations (50 and 5 mg/L). As displayed in Figure 1, time-kill data demonstrated antagonistic effect for all PPIs at high concentration (50 mg/L). The antagonistic effect was observed at 3 h for *A. baumannii*, at 6 h for *E. coli* and *E. faecalis*, at 12 h for *K. pneumoniae* and *E. cloacae*, and at 24 h for *S. aureus*. For most of the time, bacterial colony counts in lansoprazole (50 mg/L) group was lower than in omeprazole (50 mg/L) and pantoprazole (50 mg/L) group, except for the *A. baumannii* strain which has the same MIC value for the three PPIs. With the addition of omeprazole and pantoprazole at 5 mg/L, bacterial colony counts of four strains (*E. coli*, *K. pneumoniae*, *E. cloacae* and *E. faecalis*) were increased by at least 1  $\log_{10}$  CFU/mL when compared with tigecycline alone at 12 h. The antagonistic effect could be observed in *E. cloacae* at 12 h for pantoprazole and at 24 h for omeprazole. And at 12 h, antagonistic effect could also be found in *E. faecalis* in the presence of 5 mg/L omeprazole or pantoprazole.

These data show that *in vitro* susceptibility of tigecycline can be influenced by an addition of PPIs in the test medium. The effect of PPIs seems negligible for most clinical strains when the concentration is low except for pantoprazole which increased the  $\text{MIC}_{50}$  for *E. coli*, *K. pneumoniae* and *E. faecalis* at the concentration of 5 mg/L. Understanding the reason for such liquidity spillovers is of broad interest because it can be clarifying on sudden and short systematic liquidity crises. Nonetheless, the liquidity spillover causes are not yet well understood. But with much higher doses of 50 mg/L, the susceptibility decreased dramatically, indicating the influence might be concentration-dependent. In addition, the effect of PPIs on the activity of tigecycline may differ among

**Table 1.** Effect of the proton pump inhibitors (PPIs) lansoprazole, omeprazole and pantoprazole at three different concentrations on the MICs of tigecycline in clinical isolates of 6 species of pathogens.

| Species             | n <sup>a</sup> | MIC <sub>50</sub> (mg/L) |                |          |          |              |             |           |                |            |               |  |
|---------------------|----------------|--------------------------|----------------|----------|----------|--------------|-------------|-----------|----------------|------------|---------------|--|
|                     |                | Tigecycline alone        | + Lansoprazole |          |          | + Omeprazole |             |           | + Pantoprazole |            |               |  |
|                     |                |                          | 5 mg/L         | 10 mg/L  | 50 mg/L  | 5 mg/L       | 10 mg/L     | 50 mg/L   | 5 mg/L         | 10 mg/L    | 50 mg/L       |  |
| <i>E. coli</i>      | 12             | 0.25                     | 0.25           | 0.25     | <b>2</b> | 0.25         | <b>0.5</b>  | <b>32</b> | <b>0.5</b>     | <b>0.5</b> | <b>&gt;32</b> |  |
| <i>K. pneumonia</i> | 10             | 0.5                      | 0.5            | 0.5      | <b>4</b> | 0.5          | <b>1</b>    | <b>32</b> | <b>1</b>       | <b>2</b>   | <b>&gt;32</b> |  |
| <i>E. cloacae</i>   | 12             | 0.5                      | 0.5            | 0.5      | <b>4</b> | 0.5          | <b>1</b>    | <b>32</b> | 0.5            | <b>1</b>   | <b>&gt;32</b> |  |
| <i>A. baumannii</i> | 12             | 0.5                      | 0.5            | <b>1</b> | <b>4</b> | 0.5          | <b>1</b>    | <b>16</b> | 0.5            | <b>1</b>   | <b>16</b>     |  |
| <i>S. aureus</i>    | 12             | 0.25                     | 0.25           | 0.25     | <b>1</b> | 0.25         | <b>0.5</b>  | <b>8</b>  | 0.25           | <b>0.5</b> | <b>8</b>      |  |
| <i>E. faecalis</i>  | 10             | 0.125                    | 0.125          | 0.125    | <b>1</b> | 0.125        | <b>0.25</b> | <b>8</b>  | <b>0.25</b>    | <b>0.5</b> | <b>16</b>     |  |

<sup>a</sup>The number of strains of each species tested in the study.  
Increased MICs in  $>50\%$  of isolates are indicated in boldface.  
doi:10.1371/journal.pone.0086715.t001

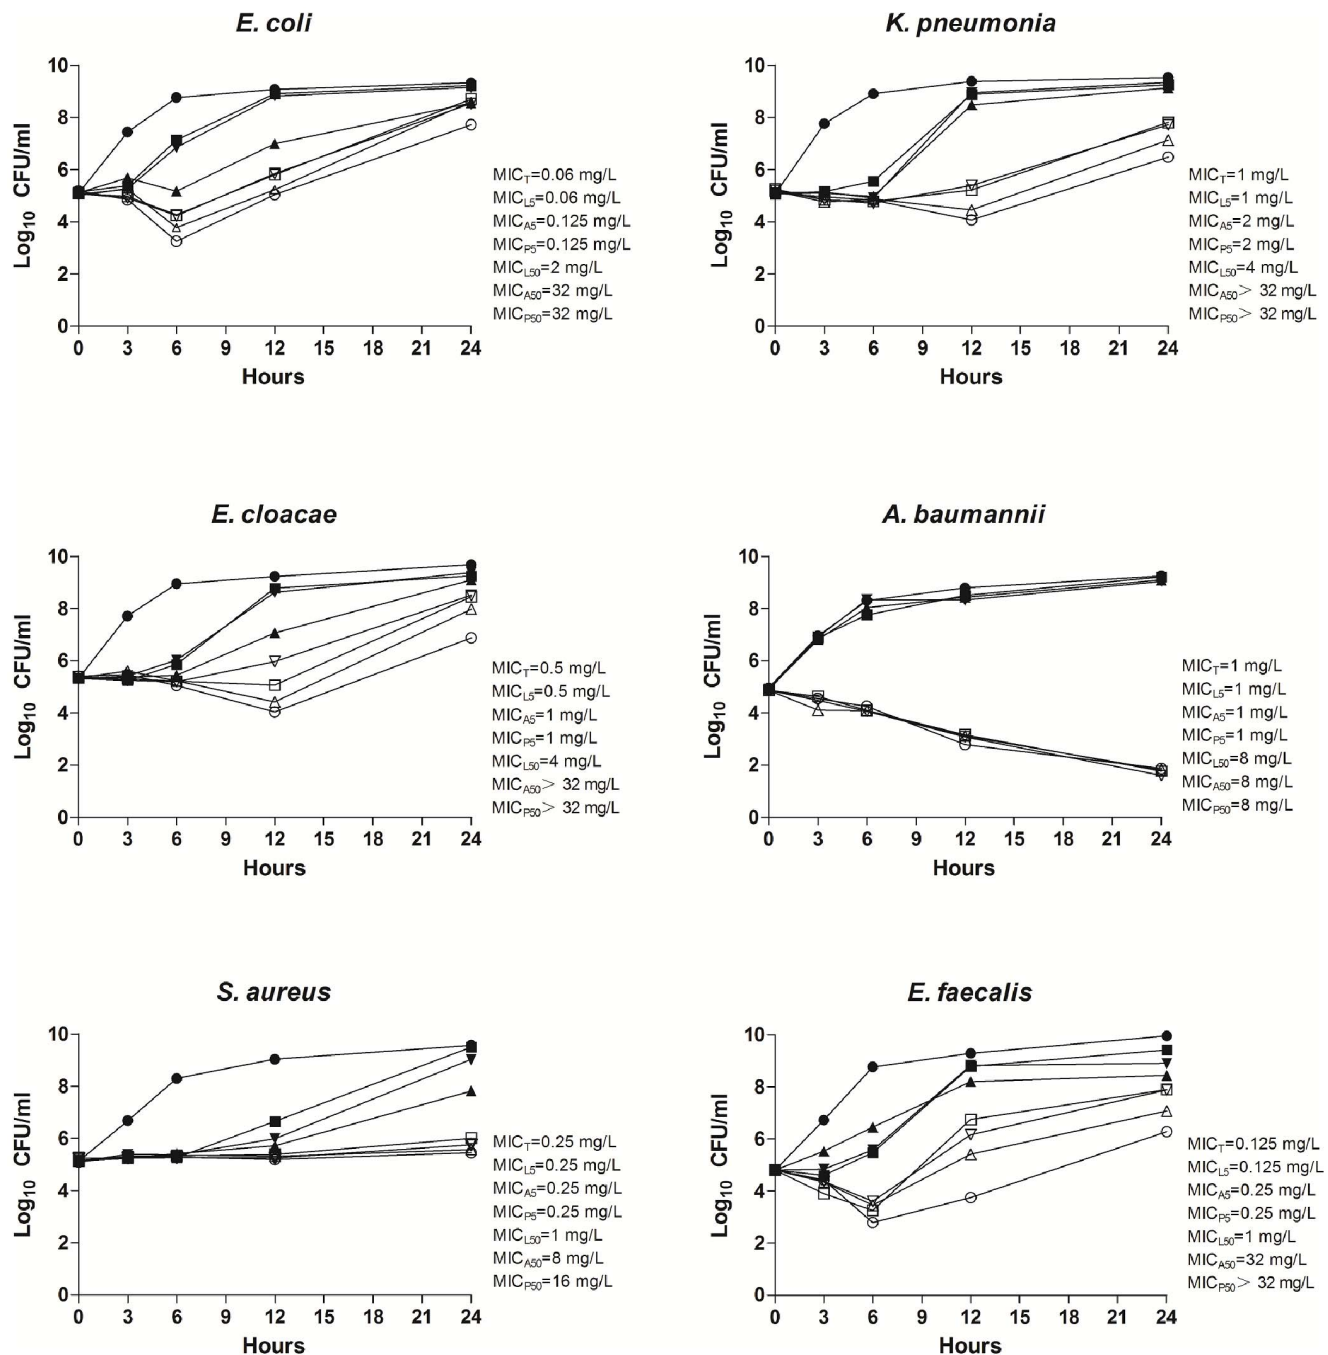

**Figure 1. Time-kill curves showing effects of proton pump inhibitors (PPIs) on the activity of tigecycline.** MIC<sub>T</sub>, MIC for tigecycline alone; MIC<sub>L5</sub> and MIC<sub>L50</sub>, MIC for tigecycline in combination with 5 mg/L and 50 mg/L lansoprazole; MIC<sub>A5</sub> and MIC<sub>A50</sub>, MIC for tigecycline in combination with 5 mg/L and 50 mg/L omeprazole; MIC<sub>P5</sub> and MIC<sub>P50</sub>, MIC for tigecycline in combination with 5 mg/L and 50 mg/L pantoprazole. ●, Control; ▲, 50 mg/L lansoprazole; ▼, 50 mg/L omeprazole; ■, 50 mg/L pantoprazole; △, 5 mg/L lansoprazole; ▽, 5 mg/L omeprazole; □, 5 mg/L pantoprazole; ○, tigecycline alone. The *in vitro* time-kill experiments were duplicated; mean values are plotted. In all duplicate experiments, similar time-kill results were obtained.

doi:10.1371/journal.pone.0086715.g001

different species of pathogens. For example, after addition of 50 mg/L omeprazole, the MIC<sub>50</sub> of *E. coli* increased by 128-fold while the MIC<sub>50</sub> of *S. aureus* increased by 32-fold, as shown in Table 1.

The influence of PPIs on *in vitro* susceptibilities of tigecycline suggests that the concomitant use of PPIs may weaken its antibacterial activity in the clinic. After intravenous administration

of lansoprazole 30 mg twice daily, the C<sub>max</sub> in plasma among healthy volunteers were approximately 1.45–2.2 mg/L. [10] And after intravenous administration of omeprazole 40 mg every 24 h, the mean C<sub>max</sub> in plasma were 2.51±0.65 mg/L in individuals with homozygous extensive metabolizer and 3.45±0.65 mg/L in those with poor metabolizer. [11] In our study, we found that an addition of 5 mg/L lansoprazole or omeprazole had no or little

effects on the susceptibility of tigecycline, which implies that the use of these two PPIs at routine dosage regimen may not influence the antimicrobial activity of tigecycline. However, following single intravenous infusion of pantoprazole at a dose of 40 mg administered over 15 min, the  $C_{max}$  in serum ranged from 3.21–7.05 mg/L in healthy male subjects. [12] And the MIC<sub>50</sub> values doubled for *E. coli*, *K. pneumoniae* and *E. faecalis* at pantoprazole concentration of 5 mg/L. This suggests that the activity of tigecycline against some pathogens may be affected by the concomitant use of pantoprazole under physiological conditions.

The mechanism by which PPIs influence *in vitro* activity of tigecycline is still unclear. This influence appears to be specific to tigecycline, because PPIs did not increase the MICs of other antibiotics, such as tetracycline, meropenem, ceftazidime, levofloxacin, gentamicin and streptomycin. [6,13] As effective agents inactivate H<sup>+</sup>,K<sup>+</sup> ATPase in human parietal cells, [14] PPIs may also play a role on the H<sup>+</sup>,K<sup>+</sup> ATPase in bacterial cells and then affect uptake of the drug. Additionally, except for inhibiting proton pumps, the toxicity of PPIs may impair other efflux pumps of bacterial cells, which may increase the MICs for those bacteria as well.

## References

1. Pankey GA (2005) Tigecycline. *J Antimicrob Chemother* 56: 470–480.
2. Bradford PA, Weaver-Sands DT, Petersen PJ (2005) *In vitro* activity of tigecycline against isolates from patients enrolled in phase 3 clinical trials for complicated skin and skin structure infections and complicated intra-abdominal infections. *Clin Infect Dis* 41 Suppl 5: S315–S322.
3. Sun Y, Cai Y, Liu X, Bai N, Liang B et al. (2013) The emergence of clinical resistance to tigecycline. *Int J Antimicrob Agents* 41: 110–116.
4. Cordina C, Hill R, Deshpande A, Hood J, Inkster T (2012) Tigecycline-resistant *Enterococcus faecalis* associated with omeprazole use in a surgical patient. *J Antimicrob Chemother* 67: 1806–1807.
5. Werner G, Gfrörer S, Fleige C, Witte W, Klare I (2008) Tigecycline-resistant *Enterococcus faecalis* strain isolated from a German intensive care unit patient. *J Antimicrob Chemother* 61: 1182–1183.
6. Yang Y, Chua KL (2013) Assessment of the effect of efflux pump inhibitors on *in vitro* antimicrobial susceptibility of multidrug-resistant *Acinetobacter baumannii*. *Int J Antimicrob Agents* 42: 283–284.
7. Clinical and Laboratory Standards Institute (2013) Performance Standards for Antimicrobial Susceptibility Testing; Twenty-Third Informational Supplement (M100-S23). CLSI, Wayne, PA, USA.
8. Clinical and Laboratory Standards Institute (2012) Methods for Dilution Antimicrobial Susceptibility Tests for Bacteria That Grow Aerobically; Approved Standard—Ninth Edition (M07-A9). CLSI, Wayne, PA, USA.
9. Petersen PJ, Labthavikul P, Jones CH, Bradford PA (2006) *In vitro* antibacterial activities of tigecycline in combination with other antimicrobial agents determined by checkerboard and time-kill kinetic analysis. *J Antimicrob Chemother* 57: 573–576.
10. Zhang D, Zhang Y, Liu M, Wang X, Yang M, et al. (2013) Pharmacokinetics of lansoprazole and its main metabolites after single and multiple intravenous doses in healthy Chinese subjects. *Eur J Drug Metab Pharmacokinet* 38: 209–215.
11. Wang Y, Zhang H, Meng L, Wang M, Yuan H, et al. (2010) Influence of CYP2C19 on the relationship between pharmacokinetics and intragastric pH of omeprazole administered by successive intravenous infusions in Chinese healthy volunteers. *Eur J Clin Pharmacol* 66: 563–569.
12. Pue MA, Laroche J, Meineke I, De Mey C (1993) Pharmacokinetics of pantoprazole following single intravenous and oral administration to healthy male subjects. *Eur J Clin Pharmacol* 44: 575–578.
13. Aeschlimann JR, Dresser LD, Kaatz GW, Rybak MJ (1999) Effects of NorA inhibitors on *in vitro* antibacterial activities and postantibiotic effects of levofloxacin, ciprofloxacin, and norfloxacin in genetically related strains of *Staphylococcus aureus*. *Antimicrob Agents Chemother* 43: 335–340.
14. Fellenius E, Berglindh T, Sachs G, Olbe L, Elander B et al. (1981) Substituted benzimidazoles inhibit gastric acid secretion by blocking (H<sup>+</sup> K<sup>+</sup>) ATPase. *Nature* 290: 156–161.

In conclusion, the findings of this study demonstrate PPIs can influence *in vitro* antibacterial activity of tigecycline in a concentration-dependent manner. Compared with lansoprazole and omeprazole, pantoprazole is more likely to interfere with the antimicrobial activity of tigecycline in the clinic when human body pharmacokinetics of these PPIs was considered. Since drug concentrations tested in our study were static and the elimination half-life of PPIs in serum is shorter than that of tigecycline, further *in vivo* studies using ideally animal models are needed to confirm these conclusions.

## Acknowledgments

We would like to thank all the staff members of the department of Clinical Pharmacology.

## Author Contributions

Conceived and designed the experiments: WN JC RW. Performed the experiments: WN XC BL YC. Analyzed the data: WN JC. Contributed reagents/materials/analysis tools: WN XC BL YC. Wrote the paper: WN JC RW.
